# Supplementary material for: Role of Wnt Signaling During In-Vitro Bovine Blastocyst Development and Maturation in Synergism with PPARδ Signaling
Source: PubMed Central journal article supplement (PMC7226827; doi:10.3390/cells9040923), 2020-04-09
Supplement: cells-09-00923-s001.pdf [file cells-09-00923-s001.pdf]

## Supplementary Materials:

**Supplementary Table S1: List of qRT-PCR primers.**

| Gene Name        | Forward                  | Reverse                  | Accession #    |
|------------------|--------------------------|--------------------------|----------------|
| GAPDH            | TCAACGGCACAGTCAAGG       | ACATACTCAGCACCAGCATCAC   | NM_001034034   |
| GSK3 $\beta$     | AGTATACACCAACTGCCCGACT   | TGAAGTTGAAGAGTGCAGGTGT   | NM_001101310.1 |
| $\beta$ -catenin | AATCCGAGCTGGACCTCAATGACA | TATCATGTCCAAGCAGCCCGAGAA | NM_174637.4    |
| Axin2            | TGCTTATCTCTTCCGGACTTTC   | CGCTTTGGCTACTCGTAAAGTT   | XM_024979963.1 |
| c-Myc            | TTTTCTCCGTCCTCTGACTCTC   | TTCTCATCCTCTTGTTCTTCC    | NM_001046074.2 |
| CyclinD1         | TGAAGGAGACCATTCCCTTG     | CCACTTGAGCTTGTTACCA      | NM_007631.2    |
| PPAR $\alpha$    | ATATTTCCCTCTTTGTGGCTGC   | ATGGTTGTTCTGTAGGTGGAGT   | XM_024991367   |
| PPAR $\gamma$    | GACTTCTCCAGCATTCCACTC    | ATACAGGCTCCACTTTGATTGC   | NM_181024      |
| PPAR $\delta$    | AGAGCACTCACTTCCTTCCAG    | GTTGCGGTTCTTCTTCTGGATT   | XM_024983411   |
| Cpt1a            | GAGGGAGACTTTACACGGATGA   | AGATGTATTCTCCACCAGTC     | NM_001304989   |
| Pdk4             | GGTGATTGTTGTCTTGGGGAAA   | AATTATCCATCACAGGCGTTGG   | NM_001101883   |

**Supplementary Table S2: List of antibodies used:**

| Target           | Cat #      | Manufacturer             |
|------------------|------------|--------------------------|
| $\beta$ -catenin | ab32572    | Abcam                    |
| Oct4             | Sc-5279    | Santa Cruz               |
| Cdx2             | AM3920119  | Bio Genex                |
| c-Myc            | D84C12     | Cell Signaling           |
| Cox2             | Sc-19999   | Santa Cruz               |
| PPAR $\delta$    | LS-C437498 | LS-BioScience            |
| Cpt1a            | Sc-393070  | Santa Cruz               |
| DAPI             | 62248      | Thermo Fisher scientific |
| FITC             | B2119      | Santa Cruz               |
| TRITC            | A6071      | Invitrogen               |

**Supplementary Table S3: Effect of PPAR $\delta$  inhibitor on bovine blastocyst development and hatching:**

| Groups       | Oocytes, n | Speculated Zygote, n | Cleaved Embryos, n %             | Total Blastocyst %                | Hatched Blastocyst %            |
|--------------|------------|----------------------|----------------------------------|-----------------------------------|---------------------------------|
| Control      | 391        | 369                  | 288(78.0 $\pm$ 0.9) <sup>b</sup> | 103(28.0 $\pm$ 0.3) <sup>c</sup>  | 45(44.4 $\pm$ 3.1) <sup>d</sup> |
| (8 $\mu$ M)  | 340        | 328                  | 253(77.1 $\pm$ 0.4) <sup>b</sup> | 88(27.0 $\pm$ 0.5) <sup>b,c</sup> | 33(37.1 $\pm$ 0.8) <sup>c</sup> |
| (10 $\mu$ M) | 337        | 331                  | 246(74.1 $\pm$ 0.6) <sup>a</sup> | 82(25.0 $\pm$ 0.5) <sup>b</sup>   | 27(32.6 $\pm$ 1.9) <sup>c</sup> |
| (12 $\mu$ M) | 338        | 317                  | 236(74.0 $\pm$ 0.5) <sup>a</sup> | 57(18.3 $\pm$ 0.8) <sup>a</sup>   | 12(20.9 $\pm$ 2.2) <sup>b</sup> |
| (15 $\mu$ M) | 208        | 199                  | 148(74.6 $\pm$ 1.3) <sup>a</sup> | 32(16.2 $\pm$ 1.7) <sup>a</sup>   | 3(9.4 $\pm$ 4.0) <sup>a</sup>   |

<sup>a,b</sup>  $p < 0.05$  with different superscript in the column indicate significant difference.

Supplementary Figure S1:

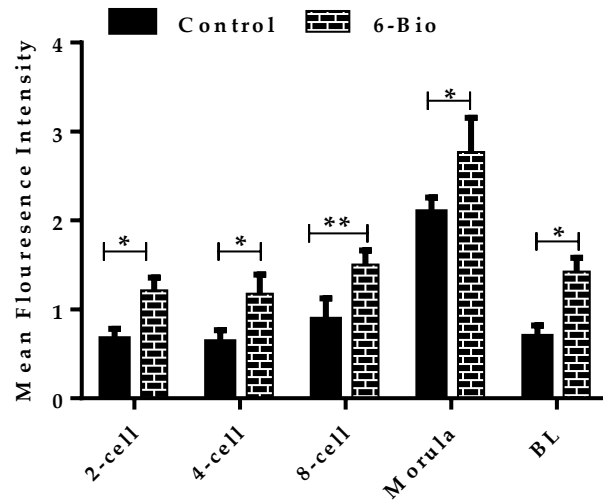

Figure S1. Mean fluorescence intensity of  $\beta$ -catenin in control and 6-Bio treated groups at different stages of embryonic development. Bar graph data of mean fluorescence intensities presented as a means  $\pm$  SEM from three individual sets of experiment, including n = 20 BLs per group in each replicate. \* p < 0.05; \*\* p < 0.01; indicates significant difference.

Supplementary Figure S2:

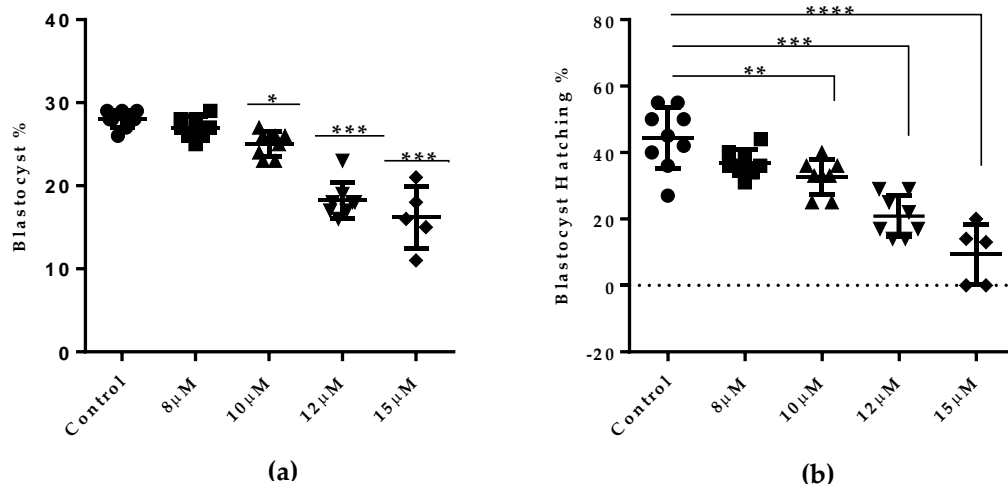

Figure S2: Effect of dose dependent inhibition of PPAR function on BL development and hatching rate. (a-b) Graphical data shows the % of bovine blastocyst development and hatching during different concentration of Gsk3787. Data presented as a means  $\pm$  SEM from three individual sets of experiment, including n = 20 BLs per group in each replicate. \* p < 0.05; \*\* p < 0.01; \*\*\* p < 0.001; \*\*\*\* p < 0.000; indicates significant difference.

Supplementary Figure S3:

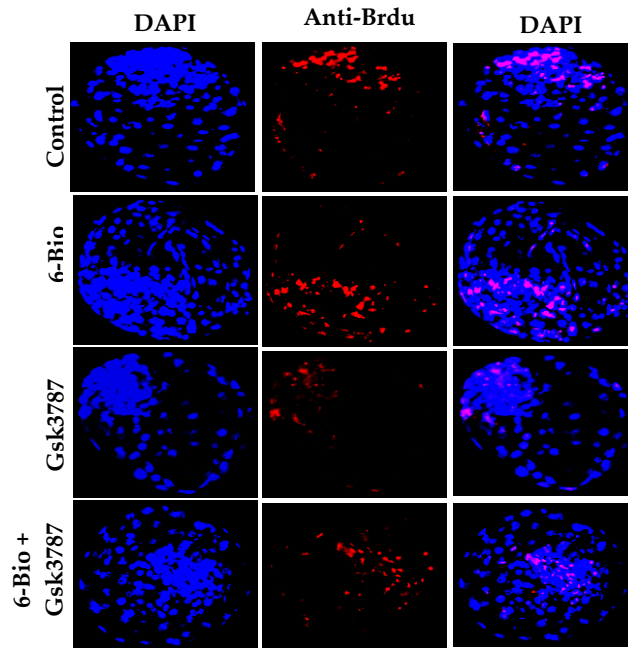

(a)

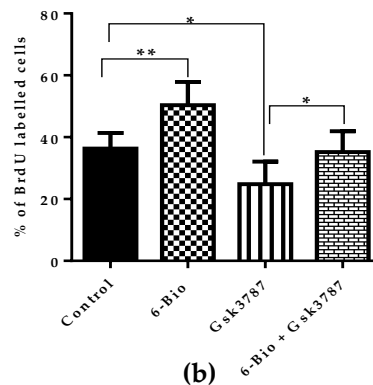

(b)

**Figure S3: BrdU proliferation assay in Wnt agonist and PPAR $\delta$  antagonist treated group. (a)** Immunofluorescence staining showing the anti-BrdU labelled cells in different treatment groups. **(b)** Graphical data shows the % of BrdU labelled cells in different treatment groups. Data presented as means  $\pm$  SEM from three individual sets of experiment, including n = 20 BLs per group in each replicate. \* p < 0.05; \*\* p < 0.01; indicates significant difference.

Supplementary Figure S4:

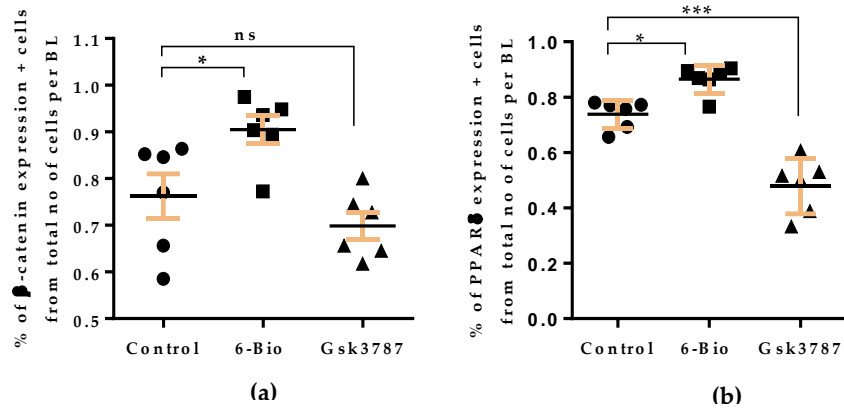

**Figure S4: Quantitative analysis of  $\beta$ -catenin and PPAR $\delta$  expression.** (a-b) graphical data represents the percentage of  $\beta$ -catenin and PPAR $\delta$  expression positive cells from total number of cells per BL in each group.  $\pm$  SEM from three individual sets of experiments (n = 20 BLs). ns, non-significant, \* p < 0.05; \*\*\* p < 0.001 indicates significant difference.
